# Supplementary material for: Transcriptomic signature, bioactivity and safety of a non-hepatoxic analgesic generating AM404 in the mid-brain PAG region
Source: Research Square preprint supplement (doi:10.21203/rs.3.rs-2883310/v1), 2023-05-04
Supplement: Supplementary file 1 [file 239b50f026ae245a8e1b5d0c.xlsx]

## Sheet: in vitro and in vivo TOX
	Summary of the Results of In Vitro and In Vivo Toxicity Studies Conducted with SRP-001
	Toxicology
	Study	Species		Duration		Doses	Key Findings
	Dose-range- finding Oral Toxicity Study26	Rat/Sprague Dawley		3 days		500, 1000,1500, 2000 mg/kg	All animals appeared unremarkable at gross necropsy. Based on the results of this study, doses for the second phase were selected.
	Single Oral Dose Toxicity and PK Study27	Dog/Beagle		Single Dose		300 mg/kg	Bioanalytical analysis revealed poor bioavailability was achieved following dosing. Capsule dosing while well tolerated in dogs at 300 mg/kg was not considered suitable for future studies.
	Dose-Range- Finding and 7- day Repeat-dose Oral Toxicity28	Dog/Beagle		7 days		30, 100, 250, 500 mg/kg	Loose feces and emesis were observed following most doses however no dose-dependent trend was observed. No test article related effects on body weight or food consumption were observed.
	28-Day Oral Toxicity Study with 14-day Recovery30	Rat/Sprague Dawley		28 days		300, 900, 1500 mg/kg/day	Based on the parameters observed, the no-adverse effect level (NOAEL) of SRP-001 when administered once daily for 28 days to Sprague Dawley rats was 1500 mg/kg.
	Two-day Oral Dose Toxicity and PK Study29	Dog/Beagle		2 days (dosed 3 times daily)		100, 900 mg/kg/day	Nearly all animals had emesis following each dose administration. Other clinical signs observed included loose or watery feces and salivation. Nearly all animals appeared normal prior to receiving their next dose. Body weight loss was also observed; however, no animal lost more than 4% of their body weight. Body weight loss correlated with decreased food consumption on Day 3. Bioanalytical analys…
	28-Day Oral Toxicity Study with 14-day Recovery31	Dog/Beagle		28 days		0, 100, 300, 900 mg/kg	No SRP-001 related changes were observed in body weights, food consumption, ophthalmology examination, electrocardiology examination, coagulation parameters or urinalysis parameters. Analysis of dogs following a 14-day recovery period, indicated that nearly all SRP-001 related changes observed on Day 29 were reversible. Only microscopic changes in Kupffer cell pigment and erythrophagocytosis and …
	Genotoxicity
	Study	Species		Duration		Doses	Key Findings
	AMES32	Salmonella typhimurium strains TA98, TA100, TA1535, TA1537, and E. coli WP2 uvrA		NA		6.67, 10.0, 33.3, 66.7, 100, 333, 667, 1000, 3333 and 5000 µg/plate	No positive mutagenic responses were observed with any of the tester strains in either the presence or absence of S9 activation.
	In Vitro Mammalian Chromosomal Aberration Assay33	Chinese Hamster Ovary Cells		4-hrs and 20-hrs		Doses tested ranged from 0.0405 to 405 µg/mL (1 mM)	Neither statistically significant nor dose dependent increases in numerical (polyploid or endoreduplicated cells) aberrations were observed at any dose in treatment groups with or without S9 (p > 0.05; Fisher’s Exact and Cochran-Armitage tests). The induction of numerical aberrations was within the 95% control limit of the historical negative control data. These results indicate SRP-001 was posit…
	In vivo Mammalian Micronucleus Assay34	Peripheral Blood Reticulocytes		2 days		500, 1000, 2000 mg/kg	Under the conditions of this study, the administration of SRP-001 at doses up to and including a dose of 2000 mg/kg/day was concluded to be negative in the Micronucleus assay.
	In vivo Mammalian Alkaline Comet Assay35	Rat Liver and Stomach cells		NA		500, 1000, 2000 mg/kg	Under the conditions of this study, the administration of SRP-001 at doses up to and including a dose of 2000 mg/kg/dose did not cause a significant increase in DNA damage in liver and stomach relative to the concurrent vehicle control. Therefore, SRP-001 was concluded to be negative (non-DNA damaging).
	Safety Pharmacology
	Organ Systems Evaluated	Species		Route	Doses*		Key Findings
	Cardiovascular (hERG assay)	Human Embryonic Kidney Cells		In vitro	0, 0.1, 1, 10, 100 µM		Weak blocker of hERG current at the highest concentration tested (100 µM) blocking by 21.4 ± 3.9%.
	Central Nervous23 System	Rat/Sprague Dawley		Oral	0, 220, 440, 660		No apparent neuropharmacological effects. Decreased body temp in the high dose group.
	Respiratory24	Rat/Sprague Dawley		Oral	0, 220, 440, 660		No significant findings.
	Cardiovascular25	Dog/Beagle		Oral	0, 30, 90, 150		No significant findings.
	Participant Characteristics for Single Ascending dose (SAD) Phase 1 clinical trial pharmacokinetic findings
	Cohort	Regimen	Treatment	N	Dose1	Tmax (h)	Cmax (ng/mL)	AUC0-last (ng.h/mL)	AUC0-24 (ng.h/mL)	AUC0-inf (ng.h/mL)	T1/2 (h)		Frel Cmax (%)	Frel AUC(0-24)	Frel AUC(0- last)	Frel AUC(0-inf)
														(%)	(%)	(%)
	1	A	SRP-001 Oral Suspension, 100 mg/mL, or matching placebo; Fasted	6	300 mg	1 (1.00-1.00)	665 (55.5)	1320 (53.4)	1620 (37.8)	1630 (37.4)	2.38 (65.9)		NA	NA	NA	NA
	2	B	SRP-001 Oral Suspension, 100 mg/mL, or matching placebo; Fasted	6	600 mg	1 (1.00-2.00)	1740 (48.7)	4940 (38.3)	5660 (25.3)	5840 (29.5)	5.04 (107.8)		NA	NA	NA	NA
	3	Period 1: C	SRP-001 Oral Suspension, 100 mg/mL, or matching placebo; Fasted	6	900 mg	1 (1.00-1.00)	2700 (35.1)	6810 (40.0)	6870 (39.3)	6970 (39.5)	3.26 (62.1)		NA	NA	NA	NA
		Period 2: D	SRP-001 Oral Suspension, 100 mg/mL, or matching placebo; Fed	6	900 mg	1 (1.00-8.00)	1200 (32.4)	6130 (25.4)	6250 (22.3)	5910 (17.1)	3.79 (74.5)		NA	NA	NA	NA
	4	E	SRP-001 Oral Suspension, 100 mg/mL, or matching placebo; Fasted	6	2000 mg	1 (1.00-2.00)	4590 (34)	19100 (26.2)	18900 (25.7)	19600 (25.7)	5.96 (65.9)		48.4a (21.9)	99.2a (19.0)	98.4a (16.3)	101a (20.3)
	1 The dose for Cohort 3 Period 2 was the same as for Cohort 3 Period 1. Cohort 3 Period 2 commenced after safety and tolerability data on Cohort 4. Regimen E demonstrated that the higher, fasted dose level was safe and well tolerated.
	Participant Characteristics for Single Ascending dose (SAD) Phase 1 clinical trial safety findings
	Parameter	Clinically Significant Abnormality (N)
		Cohort 1 (Regimen A)	Cohort 2 (Regimen B)	Cohort 3 (Regimen C)	Cohort 3 (Regimen D)	Cohort 4 (Regimen E)
		(300 mg SRP-001)	(600 mg SRP-001)	(900 mg SRP-001)	(900 mg SRP-001)	(2000 mg SRP-001)
		Fasted	Fasted	Fasted	Fed	Fasted
		[n=6]	[n=6]	[n=6]	[n=6]	[n=6]
	Clinical Chemistry	0	0	0	0	0
	pharHematology	0	0	0	0	0
	Urinalysis	0	0	0	0	0
	Vital Signs	0	0	0	0	0
	ECG	0	0	0	0	0
	Physical Exam	0	0	0	0	0
	Adverse Events	0	0	0	0	0
